# Supplementary material
Source: PubMed Central journal article supplement (PMC3472593)
Supplement: supp_dev.082909_DEV082909.pdf [file supp_dev.082909_DEV082909.pdf]

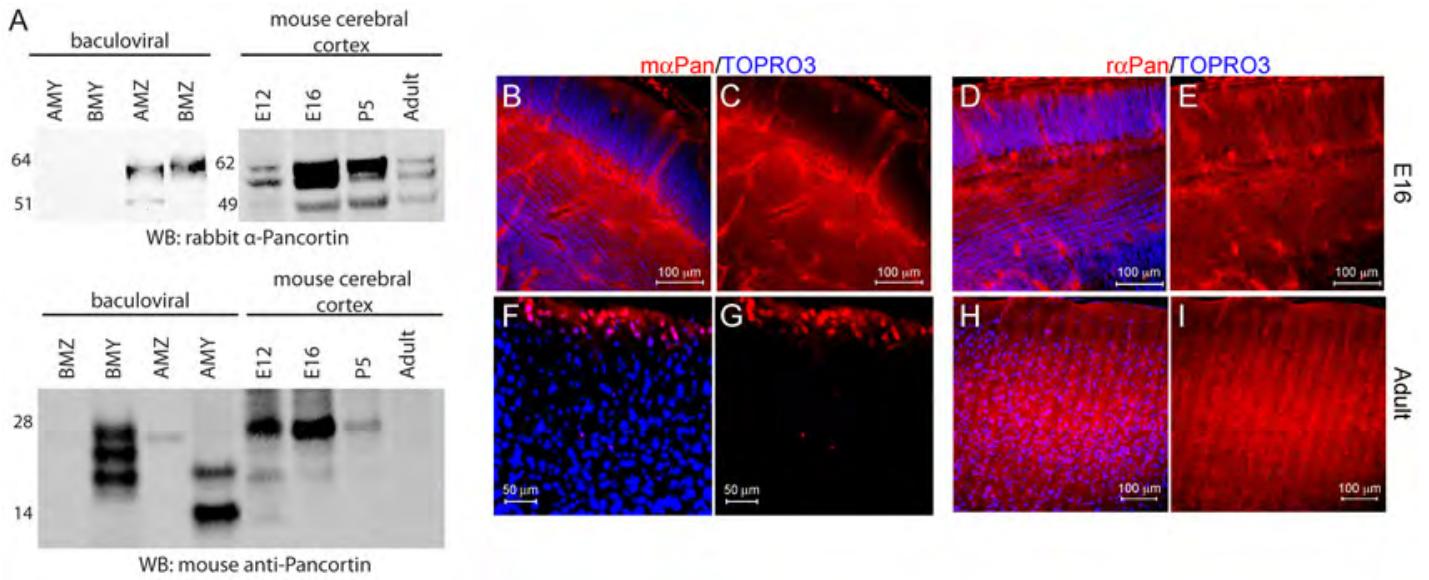

**Fig. S1. Pancortins are expressed in the developing and adult rodent cerebral cortex.** (A) Western blots of lysates from mouse cerebral cortices at different developmental time points and of baculovirus produced pancortin isoforms. Lysates were blotted with two different pancortin antibodies. Rabbit anti-pancortin (Abcam) appears to preferentially recognize AMZ and BMZ, whereas a monoclonal antibody (NeuroMab) preferentially recognizes AMY and BMY. (B-I) Coronal sections of E16 and adult wild-type mouse brains immunostained with both pancortin antibodies and counterstained with TOPRO3.
